# Supplementary material for: Clinicopathological Correlation of Chronic Thromboembolic Pulmonary Hypertension: A Retrospective Study
Source: MDPI journal article supplement (doi:10.3390/jcm11226659), 2022-11-10
Supplement: s1 [file jcm-1976754-supplementary.pdf › jcm-1976754-supplementary.pdf]

**Supplementary Materials**

**For**

**Clinicopathological Correlation of Chronic Thromboembolic Pulmonary Hypertension: A  
retrospective study**

**Manuscript ID: jcm-1976754**

**Contents:**

Figures S1 through S4 and Figure Legends

Table S1

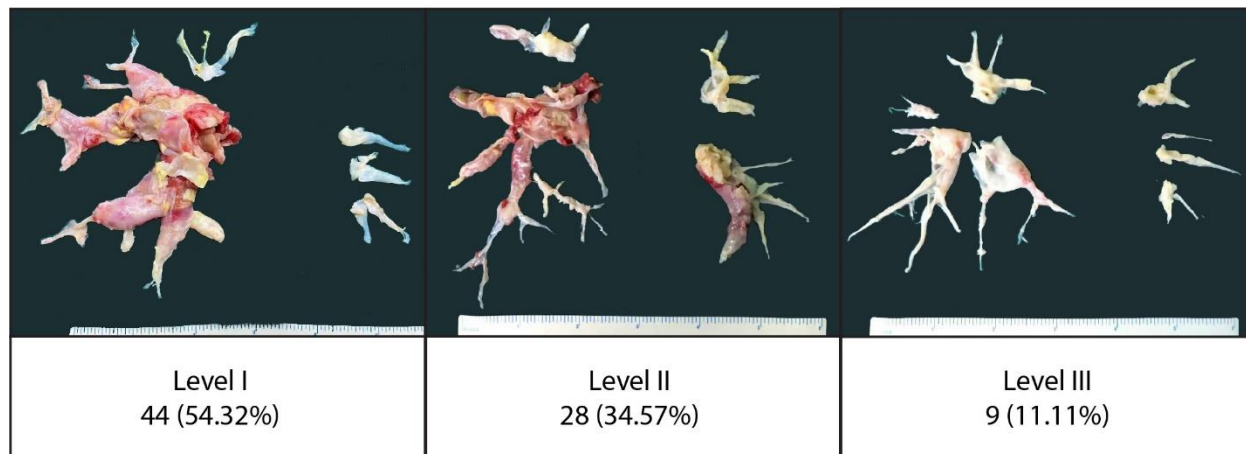

**Fig. S1.** Representative gross photographs of different types of PEA specimens by UCSD surgical classification.

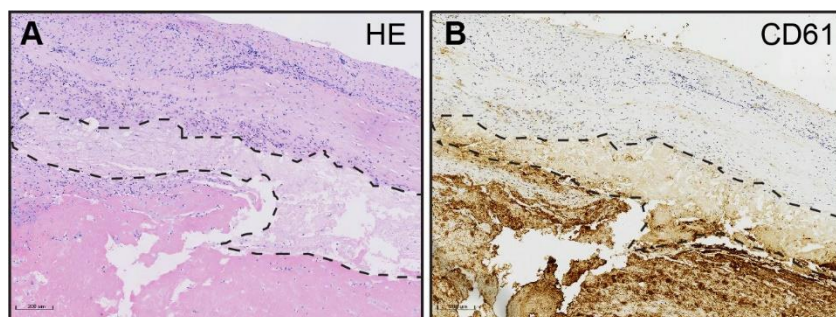

**Fig. S2.** Representative images of HE staining (A) and CD61 immunohistochemical staining (B) of atherosclerotic lesion accompanied with thrombus. Necrotic plaques were indicated by dashed lines. Scale bar =200  $\mu\text{m}$ .

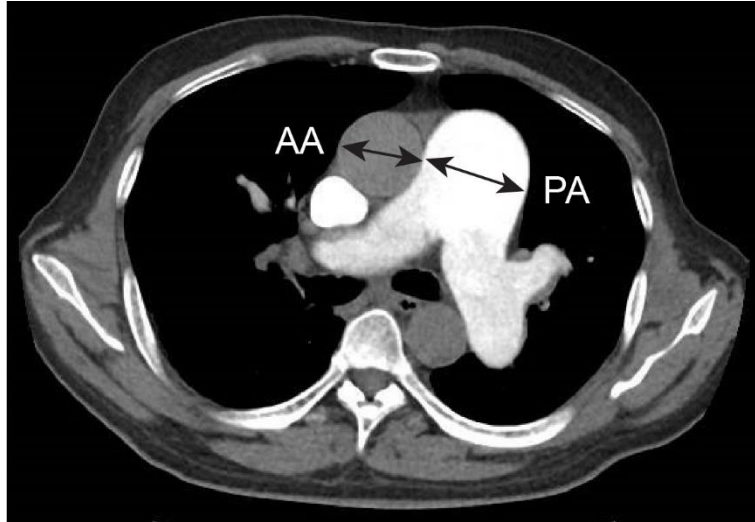

**Fig. S3.** Representative CTPA image of CTEPH. Pulmonary artery diameter (PA) and ascending aorta diameter (AA) were measured at the level of the bifurcation of the pulmonary trunk to calculate PA/AA.

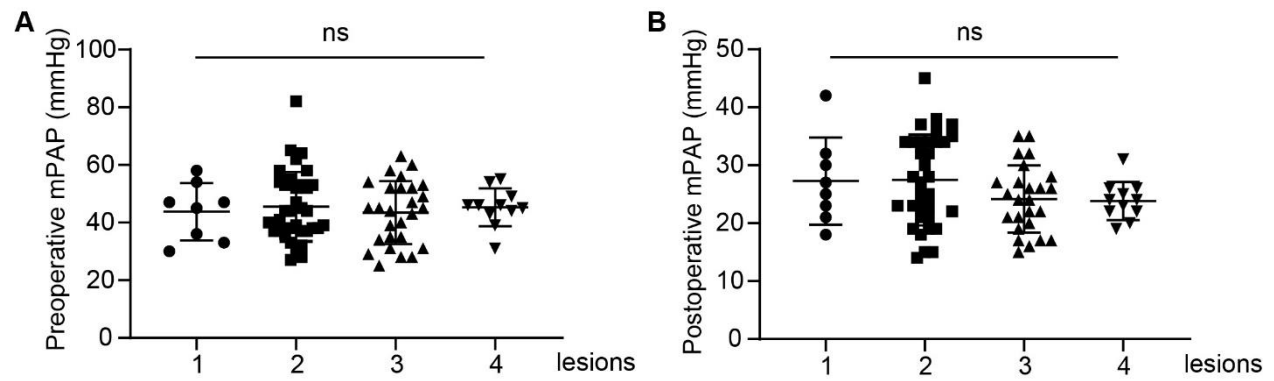

**Fig. S4.** mPAP levels were comparable among patients with one type and with several types of lesions before (A) and after PEA (B). Data are presented as mean  $\pm$  SD and analyzed through one-way ANOVA.

**Table S1.** Clinical characteristics of patients with or without atherosclerosis.

| Parameters                 | Non-atherosclerosis | Atherosclerosis | <i>p</i> -value |
|----------------------------|---------------------|-----------------|-----------------|
| Subjects n                 | 56                  | 25              |                 |
| Age                        | 49.14±13.27         | 53.44±10.47     | 0.1564          |
| Sex male%                  | 69.64               | 60              | 0.3951          |
| BMI                        | 23.90±3.14          | 25.42±4.12      | 0.0743          |
| Ever smoking%              | 33.93               | 36              | 0.8563          |
| Atherosclerotic diseases%* | 30.36               | 40              | 0.3951          |
| TC (mmol/L)                | 4.04±1.12           | 3.86±1.40       | 0.5714          |
| TG (mmol/L)                | 1.47±0.80           | 1.29±0.96       | 0.4153          |

Values are expressed as n (%) or means ± standard deviations (SDs) unless otherwise indicated.

BMI: body mass index; TC: total cholesterol; TG: triglyceride. \*Atherosclerotic diseases include coronary artery disease, carotid stenosis, and lower limb atherosclerosis.
